# Propofol Attenuates Capacitative Calcium Entry in Pulmonary Artery Smooth Muscle Cells

Mayumi Horibe, M.D.,\* Izumi Kondo, M.D.,\* Derek S. Damron, Ph.D.,† Paul A. Murray, Ph.D.‡

**Background:** Depletion of intracellular  $Ca^{2+}$  stores results in capacitative  $Ca^{2+}$  entry (CCE) in pulmonary artery smooth muscle cells (PASMCS). The authors aimed to investigate the effects of propofol on CCE and to assess the extent to which protein kinase C (PKC) and tyrosine kinases mediate propofol-induced changes in CCE.

**Methods:** Pulmonary artery smooth muscle cells were cultured from explants of canine intrapulmonary artery. Fura 2-loaded PASMCS were placed in a dish (37°C) on an inverted fluorescence microscope. Intracellular  $Ca^{2+}$  concentration was measured using fura 2 in PASMCS using a dual-wavelength spectrofluorometer. Thapsigargin (1  $\mu M$ ), a sarcoplasmic reticulum  $Ca^{2+}$ -adenosine triphosphatase inhibitor, was used to deplete intracellular  $Ca^{2+}$  stores after removing extracellular  $Ca^{2+}$ . CCE was activated when extracellular  $Ca^{2+}$  (2.2 mM) was restored.

**Results:** Thapsigargin caused a transient increase in intracellular  $Ca^{2+}$  concentration ( $182 \pm 11\%$ ). Restoring extracellular calcium (to induce CCE) resulted in a peak ( $246 \pm 12\%$  of baseline) and a sustained ( $187 \pm 7\%$  of baseline) increase in intracellular  $Ca^{2+}$  concentration. Propofol (1, 10, 100  $\mu M$ ) attenuated CCE in a dose-dependent manner (peak:  $85 \pm 3$ ,  $70 \pm 4$ ,  $62 \pm 4\%$ ; sustained:  $94 \pm 5$ ,  $80 \pm 5$ ,  $72 \pm 5\%$  of control, respectively). Tyrosine kinase inhibition (tyrphostin 23) attenuated CCE (peak:  $67 \pm 4\%$ ; sustained:  $74 \pm 5\%$  of control), but the propofol-induced decrease in CCE was still apparent after tyrosine kinases inhibition. PKC activation (phorbol 12-myristate 13-acetate) attenuated CCE (peak:  $48 \pm 1\%$ ; sustained:  $53 \pm 3\%$  of control), whereas PKC inhibition (bisindolylmaleimide) potentiated CCE (peak:  $132 \pm 11\%$ ; sustained:  $120 \pm 4\%$  of control). Moreover, PKC inhibition abolished the propofol-induced attenuation of CCE.

**Conclusion:** Tyrosine kinases activate and PKC inhibits CCE in PASMCS. Propofol attenuates CCE primarily via a PKC-dependent pathway. CCE should be considered a possible cellular target for anesthetic agents that alter vascular smooth muscle tone.

CAPACITATIVE  $Ca^{2+}$  entry involves the influx of  $Ca^{2+}$  across the sarcolemma in response to depletion of intracellular  $Ca^{2+}$  stores.<sup>1-4</sup> Capacitative  $Ca^{2+}$  entry is insensitive to voltage-gated  $Ca^{2+}$  channel inhibitors.<sup>2,3</sup> The mechanisms involved in regulating capacitative  $Ca^{2+}$  entry are not well understood. We recently demonstrated that capacitative  $Ca^{2+}$  entry exists in canine pulmonary artery smooth muscle cells (PASMCS) and serves to refill

the sarcoplasmic reticulum  $Ca^{2+}$  pool.<sup>5</sup> Moreover, we observed that capacitative  $Ca^{2+}$  entry is required to maintain  $\alpha$ -agonist-induced oscillations in intracellular  $Ca^{2+}$  concentration ( $[Ca^{2+}]_i$ ) and is involved in the contractile response to  $\alpha$ -adrenoreceptor activation.<sup>5</sup> Because capacitative  $Ca^{2+}$  entry is involved in the regulation of  $[Ca^{2+}]_i$  and vasomotor tone, it could serve as a cellular target for anesthetic agents that exert vasoactive effects.

The goal of the current study was to investigate the effect of propofol on capacitative  $Ca^{2+}$  entry in PASMCS. We tested the hypothesis that propofol would attenuate capacitative  $Ca^{2+}$  entry in PASMCS. The rationale for this hypothesis is based on two factors. First, propofol is known to inhibit voltage-gated influx of extracellular  $Ca^{2+}$  in vascular smooth muscle.<sup>6-8</sup> Second, we have demonstrated that intravenous anesthetics,<sup>9,10</sup> including supraclinical concentrations of propofol,<sup>9</sup> attenuate phenylephrine-induced  $[Ca^{2+}]_i$  oscillations in PASMCS, which require capacitative  $Ca^{2+}$  entry. Because a tyrosine kinase is involved in the signal transduction pathway for capacitative  $Ca^{2+}$  entry in PASMCS,<sup>5</sup> we also tested the hypothesis that tyrosine kinase inhibition would prevent the effects of propofol on capacitative  $Ca^{2+}$  entry. Finally, we investigated the effects of protein kinase C (PKC) activation and inhibition on capacitative  $Ca^{2+}$  entry and assessed the extent to which PKC is involved in propofol-induced changes in capacitative  $Ca^{2+}$  entry.

## Materials and Methods

### Animals

Pulmonary arteries were isolated from adult mongrel dogs. The technique of euthanasia was approved by the Cleveland Clinic Institutional Animal Care and Use Committee (Cleveland, OH). All steps were performed aseptically during general anesthesia with intravenous pentobarbital sodium (30 mg/kg) and intravenous fentanyl citrate (20  $\mu g/kg$ ). The dogs were intubated and ventilated, exsanguinated by controlled hemorrhage via a femoral artery catheter, and euthanized with electrically induced ventricular fibrillation. A left lateral thoracotomy was performed, and the heart and lungs were removed *en bloc*. The pulmonary arteries were isolated and dissected in a laminar flow hood during sterile conditions.

### Cell Culture of Pulmonary Artery Smooth Muscle Cells

Primary cultures of PASMCS were obtained as previously described.<sup>11</sup> Intralobar pulmonary arteries (ID =

\* Research Fellow, † Project Scientist, ‡ Carl E. Wasmuth Endowed Chair and Director.

Received from the Center for Anesthesiology Research, Division of Anesthesiology and Critical Care Medicine, The Cleveland Clinic Foundation, Cleveland, Ohio. Submitted for publication September 18, 2000. Accepted for publication March 9, 2001. Supported by grants No. HL-38291 and HL-40361 from the National Heart, Lung and Blood Institute, Bethesda, Maryland, and by Professor Osafumi Yuge, M.D., Ph.D., Department of Anesthesiology and Critical Care Medicine, Hiroshima University School of Medicine, Hiroshima, Japan (Dr. Horibe). Presented in part at the annual meeting of the International Anesthesia Research Society, Honolulu, Hawaii, March 12-14, 2000.

Address reprint requests to Dr. Murray: Center for Anesthesiology Research, FF-40, The Cleveland Clinic Foundation, 9500 Euclid Avenue, Cleveland, Ohio 44195. Address electronic mail to: murray@ccf.org. Individual article reprints may be purchased through the Journal Web site, www.anesthesiology.org.

2–4 mm) were carefully dissected and prepared for tissue culture. Explant cultures were prepared according to the method of Campbell and Campbell,<sup>12</sup> with minor modifications. Briefly, the endothelium and adventitia were removed together with the most superficial part of the tunica media. The media was cut into 2-mm<sup>2</sup> pieces and explanted in 25-cm<sup>2</sup> culture dishes nourished by D-MEM/F-12 medium (Gibco, Grand Island, NY) containing 10% fetal bovine serum and a 1% antibiotic-antimycotic mixture solution (10,000 units/ml penicillin, 10,000 µg/ml streptomycin, 25 µg/ml amphotericin B) and kept in a humidified atmosphere of 5% CO<sub>2</sub>:95% air at 37°C. PSMCs began to proliferate from explants after 7 days in culture. Cells were allowed to grow for an additional 7–10 days before being subcultured nonenzymatically to 35-mm glass dishes designed for fluorescence microscopy ( $\Delta T$  system; Bioprotechs Inc., Butler, PA). Cells were used for experimentation within 72 h. Cells from the first and second passage were used for experiments. More than 90% of the cells stained positive for smooth muscle  $\alpha$  actin.<sup>11</sup>

#### *Fura 2-Loading Procedure*

Pulmonary artery smooth muscle cells were loaded with fura 2 as previously described.<sup>11</sup> Twenty-four hours before experimentation, the culture medium containing 10% fetal bovine serum was replaced with serum-free medium to arrest cell growth, allow for establishment of steady state cellular events independent of cell division, and to prevent a false estimate of  $[Ca^{2+}]_i$  resulting from binding of available dye to serum protein in the medium. PSMCs were washed twice in loading buffer, which contained 125 mM NaCl, 5 mM KCl, 1.2 mM MgSO<sub>4</sub>, 11 mM glucose, 1.8 mM CaCl<sub>2</sub>, 25 mM HEPES, and 0.2% bovine serum albumin, at pH 7.40 adjusted with NaOH. PSMCs were then incubated in loading buffer containing 2 µM fura 2/AM, the acetoxymethyl ester derivative of fura 2 (Molecular Probes, Eugene, OR), at ambient temperature for 30 min. After the 30-min loading period, the cells were washed twice in loading buffer and incubated at ambient temperature for an additional 20 min before initiating the study. This provided enough time to wash away any extracellular fura 2/AM and for intracellular esterases to cleave fura 2/AM into the active fura 2.

#### *Measurement of Intracellular Ca<sup>2+</sup> Concentration*

Intracellular Ca<sup>2+</sup> concentration was measured as previously described.<sup>11</sup> Culture dishes containing fura 2-loaded PSMCs were placed in a temperature-regulated (37°C) chamber (Bioprotechs, Inc.) mounted on the stage of an Olympus IX-70 inverted fluorescence microscope (Olympus America Inc., Lake Success, NY). Fluorescence measurements were obtained from either individual PSMCs or from a cluster (two to three cells) of neighboring cells in a culture monolayer using a dual-wavelength spectrofluorometer (Deltascan RFK6002;

Photon Technology International, Lawrenceville, NJ) at excitation wavelengths of 340 and 380 nm and an emission wavelength of 510 nm. The volume of the chamber was 1.5 ml. The cells were superfused continuously at 1 ml/min with Krebs-Ringer buffer, which contained 125 mM NaCl, 5 mM KCl, 1.2 mM MgSO<sub>2</sub>, 11 mM glucose, 2.5 mM CaCl<sub>2</sub>, and 25 mM HEPES, at pH 7.40 adjusted with NaOH. The temperature of all solutions was maintained at 37°C in a water bath. Solution changes were accomplished rapidly by aspirating the buffer in the dish and transiently increasing the flow rate to 10 ml/min. Just before data acquisition, background fluorescence (*i.e.*, fluorescence between cells) was measured and subtracted automatically from the subsequent experimental measurements. Fura 2 fluorescence signals (340, 380, and 340/380 ratio) originating from PSMCs were continuously monitored at a sampling frequency of 25 Hz and were collected using a software package from Photon Technology International.

#### *Experimental Protocols*

Capacitative Ca<sup>2+</sup> entry is triggered by the depletion of intracellular Ca<sup>2+</sup> stores. Thapsigargin increases  $[Ca^{2+}]_i$  via irreversible inhibition of sarcoplasmic reticulum Ca<sup>2+</sup>-adenosine triphosphatase (ATPase).<sup>13</sup> In the absence of extracellular Ca<sup>2+</sup>, thapsigargin (1 µM) was used to deplete sarcoplasmic reticulum Ca<sup>2+</sup> stores. With thapsigargin still present, capacitative Ca<sup>2+</sup> entry was then induced by restoring the extracellular Ca<sup>2+</sup> concentration (2.2 mM).<sup>5</sup> The effects of propofol (1, 10, and 100 µM), tyrosine kinase inhibition (tyrphostin 23: 100 µM), PKC activation (phorbol 12-myristate 13-acetate: 1 µM) and PKC inhibition (bisindolylmaleimide: 1 µM) on capacitative Ca<sup>2+</sup> entry were assessed.

#### *Drug Preparation*

Propofol, thapsigargin, phorbol 12-myristate 13-acetate (all obtained from Research Biochemical International, Natick, MA), tyrphostin 23 (Calbiochem, La Jolla, CA), and bisindolylmaleimide 1 (Sigma, St. Louis, MO) were all dissolved in dimethyl sulfoxide as stock solutions. Aliquots of each stock solution were diluted 1:1000 in Krebs-Ringer buffer to achieve final concentrations in the bath. Similar dilutions of dimethyl sulfoxide in Krebs-Ringer buffer have no effect on  $[Ca^{2+}]_i$ . Pure propofol was used to avoid any effects of the intralipid emulsion on the fluorescence signal.

#### *Data Analysis*

Peak and sustained increases in  $[Ca^{2+}]_i$  were measured in PSMCs when the superfusion solution was switched from a Ca<sup>2+</sup>-free solution to a solution containing 2.2 mM Ca<sup>2+</sup>. Peak and sustained fluorescence ratio values were averaged before and after each intervention and are expressed as percent of control. The control response to which all interventions were compared was the first

capacitative  $\text{Ca}^{2+}$  entry response after thapsigargin pretreatment. This value was set at 100%. Therefore, each cell served as its own control. The “peak” response was calculated as the fluorescence change from baseline to peak fluorescence. The “sustained” response represents the fluorescence values measured 5 min after reintroduction of  $\text{Ca}^{2+}$  to the buffer. Results are presented as mean  $\pm$  SEM. Statistical analysis was performed using repeated-measures analysis of variance followed by Bonferroni–Dunn *post hoc* testing. Differences were considered statistically significant at  $P < 0.05$ .

## Results

### Capacitative $\text{Ca}^{2+}$ Entry in Pulmonary Artery Smooth Muscle Cells

Capacitative  $\text{Ca}^{2+}$  entry can be triggered by thapsigargin-induced depletion of intracellular  $\text{Ca}^{2+}$  stores. In the absence of extracellular  $\text{Ca}^{2+}$ , thapsigargin ( $1 \mu\text{M}$ ) increased  $[\text{Ca}^{2+}]_i$  by  $182 \pm 11\%$ , followed by a return of  $[\text{Ca}^{2+}]_i$  to baseline values (fig. 1, top). Once the baseline fluorescence signal had stabilized, the extracellular  $\text{Ca}^{2+}$  concentration ( $[\text{Ca}^{2+}]_o$ ) was restored (2.2 mM) in the continued presence of thapsigargin (fig. 1, top). Restoring  $[\text{Ca}^{2+}]_o$  resulted in a rapid peak increase ( $246 \pm 12\%$  of baseline) in  $[\text{Ca}^{2+}]_i$  and a sustained increase ( $187 \pm 7\%$  of baseline) in  $[\text{Ca}^{2+}]_i$  (i.e., capacitative  $\text{Ca}^{2+}$  entry was induced). The sustained increase in  $[\text{Ca}^{2+}]_i$  returned to baseline when  $[\text{Ca}^{2+}]_o$  was removed. The reproducibility of inducing capacitative  $\text{Ca}^{2+}$  entry was assessed by sequentially removing and restoring  $[\text{Ca}^{2+}]_o$  three consecutive times in the continued presence of thapsigargin. There were no significant differences in the peak or sustained increases in  $[\text{Ca}^{2+}]_i$  when  $[\text{Ca}^{2+}]_o$  was restored three consecutive times (fig. 1, bottom).

### Effect of Propofol on Capacitative $\text{Ca}^{2+}$ Entry

After depletion of sarcoplasmic reticulum  $\text{Ca}^{2+}$  stores with thapsigargin, capacitative  $\text{Ca}^{2+}$  entry was compared in the absence or presence of propofol, which was added to the superfusion buffer 5 min before restoring  $[\text{Ca}^{2+}]_o$  a second time (fig. 2, top). Propofol had no effect on baseline  $[\text{Ca}^{2+}]_i$  before the addition of  $[\text{Ca}^{2+}]_o$ . Propofol caused dose-dependent decreases in both the peak and sustained increases in  $[\text{Ca}^{2+}]_i$  when  $[\text{Ca}^{2+}]_o$  was restored (fig. 2, bottom). After washout of propofol, capacitative  $\text{Ca}^{2+}$  entry was similar in magnitude to the response measured before propofol administration (fig. 2, top).

### Role of Tyrosine Kinases in Propofol-induced Attenuation of Capacitative $\text{Ca}^{2+}$ Entry

We previously demonstrated that tyrosine kinases play a role in regulating capacitative  $\text{Ca}^{2+}$  entry in PSMCs.<sup>5</sup> In the current study, tyrphostin 23 ( $100 \mu\text{M}$ ) was used to inhibit tyrosine kinases. Tyrosine kinase inhibition atten-

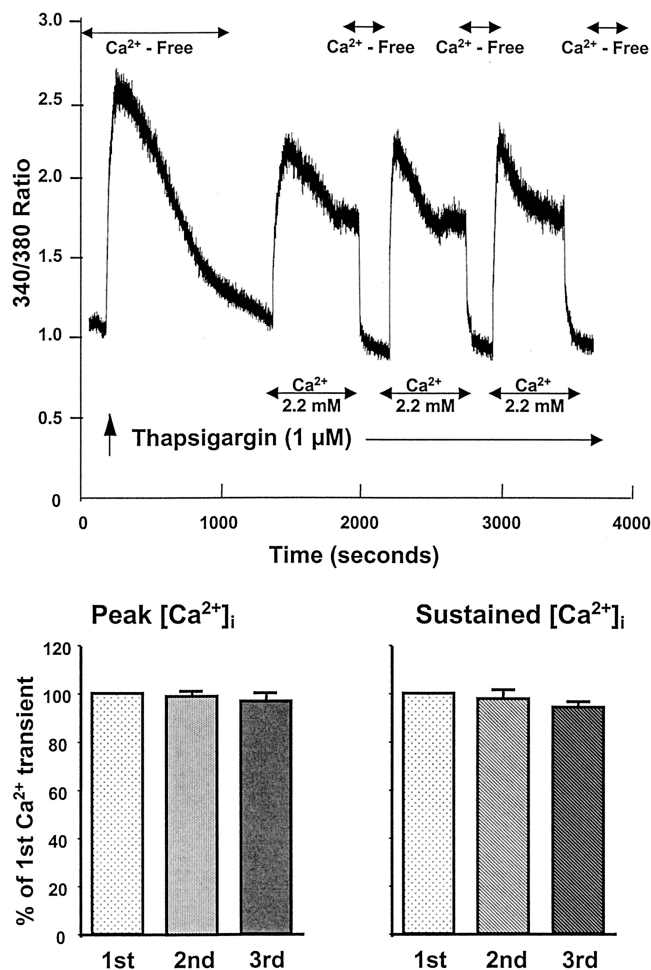

**Fig. 1.** (Top) Representative trace depicting capacitative  $\text{Ca}^{2+}$  entry after depletion of sarcoplasmic reticulum  $\text{Ca}^{2+}$  stores with thapsigargin. In the absence of extracellular  $\text{Ca}^{2+}$  ( $\text{Ca}^{2+}$  free buffer plus 2 mM EGTA), thapsigargin stimulated a transient increase in intracellular  $\text{Ca}^{2+}$  concentration ( $[\text{Ca}^{2+}]_i$ ) by releasing  $\text{Ca}^{2+}$  from sarcoplasmic reticulum  $\text{Ca}^{2+}$  stores. After  $[\text{Ca}^{2+}]_i$  had returned to baseline,  $\text{Ca}^{2+}$  was added back to the buffer, which induced a peak and sustained increase in  $[\text{Ca}^{2+}]_i$ , i.e., capacitative  $\text{Ca}^{2+}$  entry.  $[\text{Ca}^{2+}]_i$  returned to baseline values after removing extracellular  $\text{Ca}^{2+}$ . Extracellular  $\text{Ca}^{2+}$  was sequentially added and removed three times. In this and all other representative traces, the thapsigargin and capacitative  $\text{Ca}^{2+}$  entry traces represent consecutive recordings from the same cells. (Bottom) Summarized data showing the reproducibility of capacitative  $\text{Ca}^{2+}$  entry ( $n = 7$  cells).

uated both the peak ( $67 \pm 4\%$  of control) and sustained ( $75 \pm 5\%$  of control) increases in  $[\text{Ca}^{2+}]_i$  mediated through capacitative  $\text{Ca}^{2+}$  entry (fig. 3). However, in the presence of tyrosine kinase inhibition, propofol ( $100 \mu\text{M}$ ) further attenuated the peak ( $46 \pm 4\%$  of control) and sustained ( $55 \pm 2\%$  of control) increases in  $[\text{Ca}^{2+}]_i$  when  $[\text{Ca}^{2+}]_o$  was restored (fig. 4).

### Role of Protein Kinase C in Propofol-induced Attenuation of Capacitative $\text{Ca}^{2+}$ Entry

Protein kinase C has been implicated in the regulation of capacitative  $\text{Ca}^{2+}$  entry in a variety of cell types.<sup>14–16</sup> However, the extent to which PKC is involved in capac-



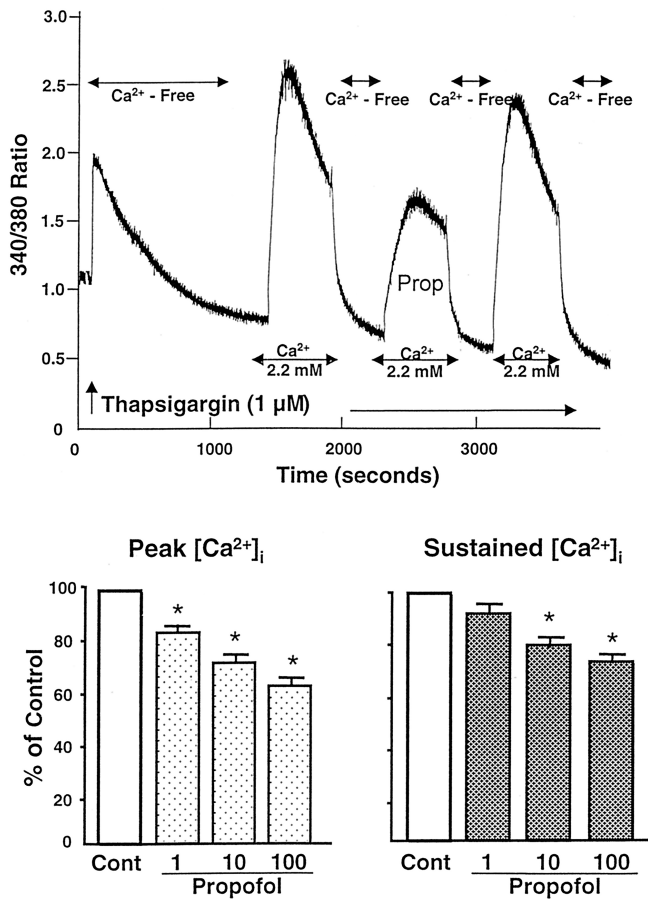

Fig. 2. (Top) Representative trace depicting the effect of propofol (100  $\mu\text{M}$ ) on capacitative calcium entry. After depletion of sarcoplasmic reticulum  $\text{Ca}^{2+}$  stores with thapsigargin, capacitative calcium entry was compared in the absence or presence of propofol, which was added to the superfusion buffer 5 min before restoring extracellular  $\text{Ca}^{2+}$  concentration ( $[\text{Ca}^{2+}]_o$ ). (Bottom) Summarized data showing the dose-dependent inhibitory effects ( $*P < 0.05$ ) of propofol (1, 10, 100  $\mu\text{M}$ ) on the peak and sustained increases in intracellular  $\text{Ca}^{2+}$  concentration ( $[\text{Ca}^{2+}]_i$ ) caused by capacitative calcium entry compared with control (Cont) ( $n = 8$  cells).

itative  $\text{Ca}^{2+}$  entry in PSMCs has not been previously investigated. Activation of PKC with phorbol 12-myristate 13-acetate (1  $\mu\text{M}$ ) attenuated both the peak ( $48 \pm 1\%$  of control) and sustained ( $53 \pm 3\%$  of control) increases in  $[\text{Ca}^{2+}]_i$  mediated *via* capacitative  $\text{Ca}^{2+}$  entry (fig. 5). In contrast, PKC inhibition with bisindolylmaleimide (1  $\mu\text{M}$ ) potentiated both the peak ( $132 \pm 11\%$  of control) and sustained ( $120 \pm 4\%$  of control) increases in  $[\text{Ca}^{2+}]_i$  when  $[\text{Ca}^{2+}]_o$  was restored (fig. 6). Moreover, in the presence of PKC inhibition, propofol (100  $\mu\text{M}$ ) had no effect on capacitative  $\text{Ca}^{2+}$  entry (fig. 7). Thus, PKC inhibition abolished the propofol-induced attenuation in capacitative  $\text{Ca}^{2+}$  entry.

## Discussion

The main findings of our study are as follows. First, both tyrosine kinases and PKC are involved in the signal

transduction pathway for capacitative  $\text{Ca}^{2+}$  entry in PSMCs. Tyrosine kinases positively regulate capacitative  $\text{Ca}^{2+}$  entry, whereas PKC negatively regulates capacitative  $\text{Ca}^{2+}$  entry. Second, propofol causes dose-dependent inhibition of capacitative  $\text{Ca}^{2+}$  entry in PSMCs. Third, the propofol-induced attenuation of capacitative  $\text{Ca}^{2+}$  entry is still observed after inhibition of tyrosine kinases. Finally, PKC inhibition abolishes the propofol-induced attenuation in capacitative  $\text{Ca}^{2+}$  entry.

It is well known that  $[\text{Ca}^{2+}]_i$  is an important determinant in the regulation of cardiac and smooth muscle contraction. In vascular smooth muscle, agonist-induced increases in  $[\text{Ca}^{2+}]_i$  primarily occur *via* release of  $\text{Ca}^{2+}$  from intracellular stores by a 1,4,5 inositol triphosphate-dependent mechanism. In addition, some agonists can trigger  $\text{Ca}^{2+}$  influx across the sarcolemma, primarily *via* voltage-gated or receptor-operated  $\text{Ca}^{2+}$  channels. An increase in  $[\text{Ca}^{2+}]_i$  activates the myosin light chain kinase through a calmodulin-dependent mechanism, re-

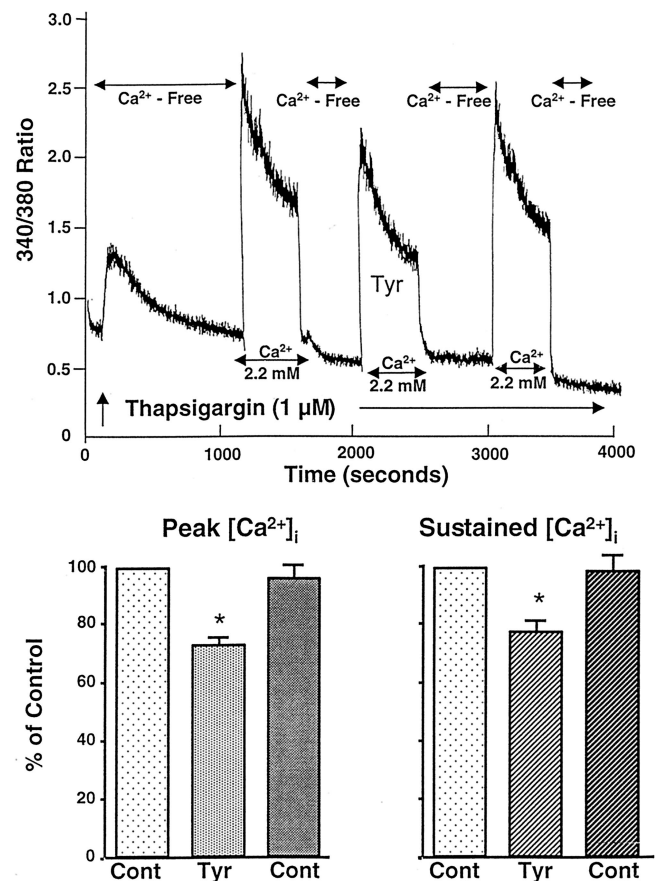

Fig. 3. (Top) Representative trace depicting the effect of the tyrosine kinase inhibitor tyrphostin 23 (Tyr; 100  $\mu\text{M}$ ) on capacitative calcium entry. After depletion of sarcoplasmic reticulum  $\text{Ca}^{2+}$  stores with thapsigargin, capacitative calcium entry was compared in the absence or presence of tyrphostin 23, which was added to the superfusion buffer 5 min before restoring extracellular  $\text{Ca}^{2+}$  concentration ( $[\text{Ca}^{2+}]_o$ ). (Bottom) Summarized data showing the inhibitory effect ( $*P < 0.05$ ) of tyrphostin 23 on capacitative  $\text{Ca}^{2+}$  entry. This inhibitory effect of tyrphostin 23 was entirely reversible ( $n = 7$  cells).

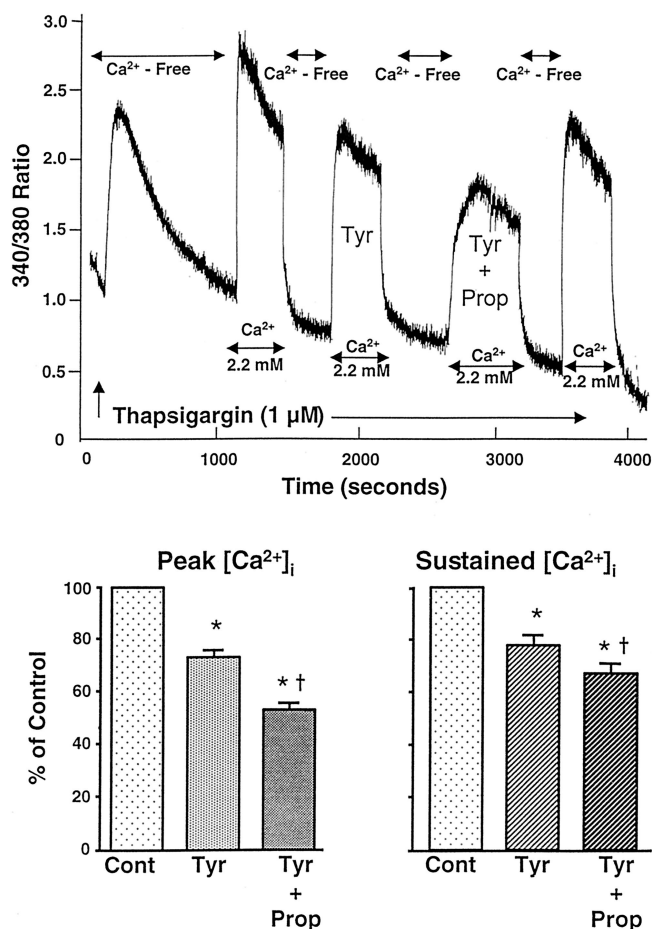

Fig. 4. (Top) Representative trace depicting the effect of tyrothostin 23 (Tyr; 100 μM) alone and in combination with propofol (100 μM) on capacitative Ca<sup>2+</sup> entry. After depletion of sarcoplasmic reticulum Ca<sup>2+</sup> stores with thapsigargin, capacitative Ca<sup>2+</sup> entry was compared in the absence or presence of tyrothostin 23 and tyrothostin 23 plus propofol, which were each added to the superfusion buffer 5 min before restoring extracellular Ca<sup>2+</sup> concentration ([Ca<sup>2+</sup>]<sub>o</sub>). (Bottom) Summarized data showing that, although tyrothostin 23 alone attenuated (\*P < 0.05) capacitative Ca<sup>2+</sup> entry, the addition of propofol resulted in a further reduction (†P < 0.05) in capacitative Ca<sup>2+</sup> entry (n = 7 cells).

sulting in phosphorylation of the myosin light chains and initiation of contraction.<sup>17</sup> [Ca<sup>2+</sup>]<sub>i</sub> is ultimately restored either by pumping the Ca<sup>2+</sup> out of the cell *via* the sarcolemmal Ca<sup>2+</sup> ATPase or Na<sup>+</sup>-Ca<sup>2+</sup> exchanger, or by resequestering Ca<sup>2+</sup> into the intracellular store by the sarcoplasmic reticulum Ca<sup>2+</sup> ATPase.<sup>18,19</sup>

In addition to the aforementioned sarcolemmal ion channels, Ca<sup>2+</sup> influx can also be controlled by the filling-state of the intracellular Ca<sup>2+</sup> store. The concept of capacitative Ca<sup>2+</sup> entry was first postulated by Putney.<sup>1</sup> According to his model, depletion of intracellular Ca<sup>2+</sup> stores results in activation of a Ca<sup>2+</sup> influx pathway that is somehow sensitive to the state of filling of intracellular Ca<sup>2+</sup> stores. Influx of Ca<sup>2+</sup> *via* capacitative Ca<sup>2+</sup> entry refills the intracellular Ca<sup>2+</sup> stores that have been depleted in response to agonist activation. In the current

study, thapsigargin was used as a tool to deplete the sarcoplasmic reticulum pool of Ca<sup>2+</sup> in the absence of extracellular Ca<sup>2+</sup> and thereby activate capacitative Ca<sup>2+</sup> entry. Consistent with our previous study,<sup>5</sup> the amplitude of the thapsigargin-induced increase in [Ca<sup>2+</sup>]<sub>i</sub> was variable, which likely reflects differences in the size of the sarcoplasmic reticulum Ca<sup>2+</sup> store in different cells. The size of the sarcoplasmic reticulum Ca<sup>2+</sup> store may depend on the cell passage number, the phase of the cell cycle, the length of time in serum-free medium, or whether the response was derived from an individual cell or a cluster of two to three neighboring cells. Restoring [Ca<sup>2+</sup>]<sub>o</sub> stimulated capacitative Ca<sup>2+</sup> entry, which was typically characterized by both a peak and sustained increase in [Ca<sup>2+</sup>]<sub>i</sub>. The rapid peak increase in [Ca<sup>2+</sup>]<sub>i</sub> results from massive influx of Ca<sup>2+</sup> into the cytosol *via* SK&F 96365-sensitive Ca<sup>2+</sup> channels that open in response to depletion of sarcoplasmic reticulum Ca<sup>2+</sup> stores.<sup>5</sup> The sustained or pro-

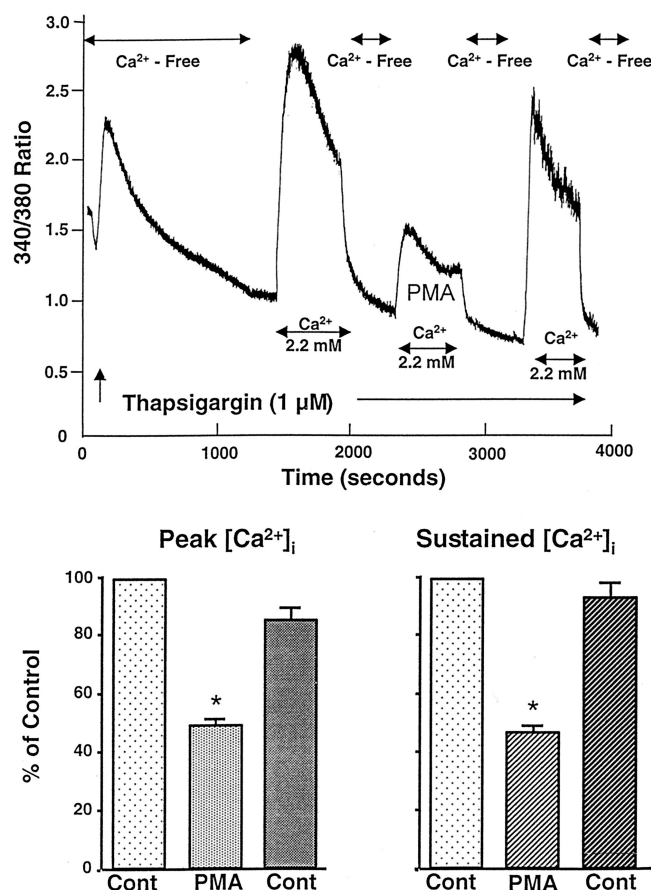

Fig. 5. (Top) Representative trace depicting the effect of the protein kinase C activator, phorbol 12-myristate 13-acetate (PMA; 1 μM), on capacitative Ca<sup>2+</sup> entry. After depletion of sarcoplasmic reticulum Ca<sup>2+</sup> stores with thapsigargin, capacitative Ca<sup>2+</sup> entry was compared in the presence and absence of PMA, which was added to the superfusion buffer 5 min before restoring extracellular Ca<sup>2+</sup> concentration ([Ca<sup>2+</sup>]<sub>o</sub>). (Bottom) Summarized data showing the inhibitory effect (\*P < 0.05) of phorbol 12-myristate 13-acetate on capacitative Ca<sup>2+</sup> entry. This effect was reversible (n = 7 cells).

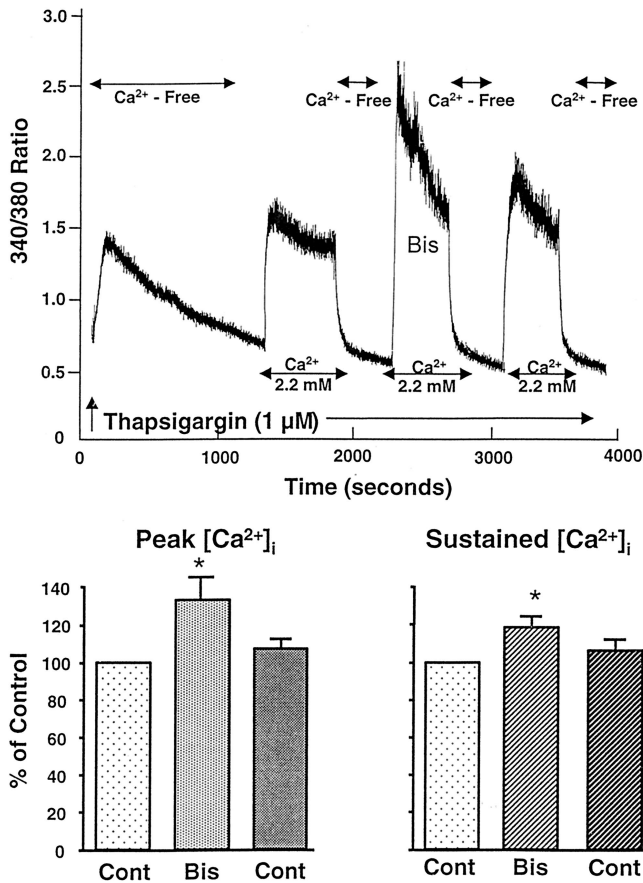

Fig. 6. (Top) Representative trace depicting the effect of the protein kinase C inhibitor bisindolylmaleimide (Bis; 1  $\mu$ M) on capacitative Ca<sup>2+</sup> entry. After depletion of sarcoplasmic reticulum Ca<sup>2+</sup> stores with thapsigargin, capacitative Ca<sup>2+</sup> entry was compared in the presence and absence of bisindolylmaleimide, which was added to the superfusion buffer 5 min before restoring extracellular Ca<sup>2+</sup> concentration ([Ca<sup>2+</sup>]<sub>o</sub>). (Bottom) Summarized data showing the potentiating effect (\**P* < 0.05) of bisindolylmaleimide on capacitative Ca<sup>2+</sup> entry. This effect was reversible (*n* = 7 cells).

longed increase in [Ca<sup>2+</sup>]<sub>i</sub> is more complex. Because thapsigargin is an irreversible inhibitor of the sarcoplasmic reticulum Ca<sup>2+</sup> ATPase, the sarcoplasmic reticulum is incapable of refilling with Ca<sup>2+</sup> despite the increased availability of cytosolic free Ca<sup>2+</sup>. As a result, capacitative Ca<sup>2+</sup> entry across the sarcolemma is sustained, and a new steady state level of [Ca<sup>2+</sup>]<sub>i</sub> is achieved as other mechanisms regulating Ca<sup>2+</sup> extrusion (Na<sup>+</sup>-Ca<sup>2+</sup> exchanger and the sarcolemmal Ca<sup>2+</sup> ATPase) begin to offset the continued influx of Ca<sup>2+</sup>. If the sarcoplasmic reticulum is allowed to refill, as we have previously demonstrated using a reversible inhibitor of the sarcoplasmic reticulum Ca<sup>2+</sup> ATPase (cyclopiazonic acid), the response to capacitative Ca<sup>2+</sup> entry is only transient, and a sustained phase is not evident.<sup>5</sup>

Thapsigargin-induced capacitative Ca<sup>2+</sup> entry does not involve activation of intracellular second messengers (e.g., 1,4,5 inositol triphosphate). The cellular mechanism that mediates capacitative Ca<sup>2+</sup> entry has been

intensively investigated, although it has yet to be definitively identified. Various models have been postulated to explain how the sarcoplasmic reticulum communicates with the plasma membrane. These models can generally be divided into those that propose the existence of a diffusible factor and those that suggest that the signal is transferred *via* protein phosphorylation and dephosphorylation.<sup>2</sup> Potentially important diffusible second messengers released from the storage organelles include cytochrome P450 metabolites,<sup>20</sup> G proteins,<sup>21</sup> or a low-molecular-weight compound called Ca<sup>2+</sup> influx factor.<sup>22</sup> Models based on phosphorylation and dephosphorylation interactions suggest that PKC activation either inhibits<sup>14,23</sup> or stimulates<sup>24</sup> capacitative Ca<sup>2+</sup> entry depending on the cell type, whereas tyrosine kinase or protein kinase A activation are consistently associated with activation of capacitative Ca<sup>2+</sup> entry.<sup>14,25-27</sup>

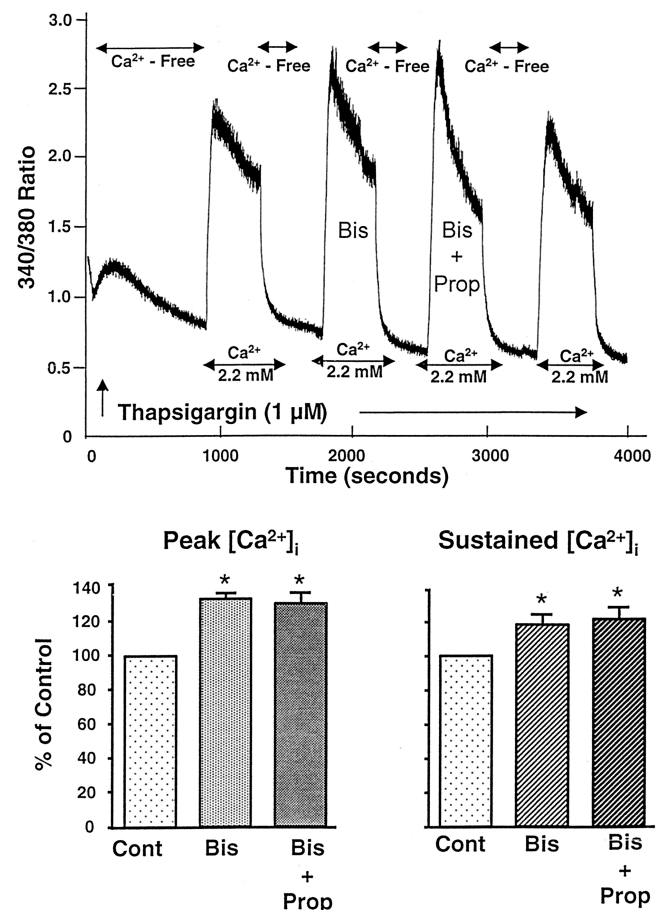

Fig. 7. (Top) Representative trace depicting the effect of bisindolylmaleimide (Bis; 1  $\mu$ M) alone and in combination with propofol (Prop; 100  $\mu$ M) on capacitative Ca<sup>2+</sup> entry. After depletion of sarcoplasmic reticulum Ca<sup>2+</sup> stores with thapsigargin, capacitative Ca<sup>2+</sup> entry was compared in the absence or presence of bisindolylmaleimide and bisindolylmaleimide plus propofol, which were each added to the superfusion buffer 5 min before restoring extracellular Ca<sup>2+</sup> concentration ([Ca<sup>2+</sup>]<sub>o</sub>). (Bottom) Summarized data showing that bisindolylmaleimide alone potentiated (\**P* < 0.05) capacitative Ca<sup>2+</sup> entry. In the presence of bisindolylmaleimide, propofol no longer had an inhibitory effect on capacitative Ca<sup>2+</sup> entry (*n* = 7 cells).



Because capacitative  $\text{Ca}^{2+}$  entry is involved in the regulation of  $[\text{Ca}^{2+}]_i$  and vasomotor tone in PSMCs,<sup>5</sup> the ion channel associated with capacitative  $\text{Ca}^{2+}$  entry may serve as a cellular target for propofol. In cultured A10 and rat aortic smooth muscle cells, propofol was reported to inhibit voltage-gated  $\text{Ca}^{2+}$  channels but to have no effect on capacitative  $\text{Ca}^{2+}$  entry.<sup>6</sup> In contrast, propofol attenuated capacitative  $\text{Ca}^{2+}$  entry in cultured aortic smooth muscle cells from normotensive rats,<sup>28</sup> and this effect was even more prominent in hypertensive rats. In our study using canine PSMCs, propofol caused a dose-dependent decrease in capacitative  $\text{Ca}^{2+}$  entry. Typical free plasma concentrations of propofol range from 1 to 10  $\mu\text{M}$ . Thus, propofol attenuated capacitative  $\text{Ca}^{2+}$  entry at clinically relevant concentrations. Tyrosine kinase inhibition also attenuated capacitative  $\text{Ca}^{2+}$  entry. However, in the presence of tyrosine kinase inhibition with tyrphostin 23, propofol further suppressed capacitative  $\text{Ca}^{2+}$  entry. These results suggest that inhibition of tyrosine kinases is not the primary mechanism for propofol-induced inhibition of capacitative  $\text{Ca}^{2+}$  entry. In contrast, inhibition of PKC with bisindolylmaleimide resulted in potentiation of capacitative  $\text{Ca}^{2+}$  entry, whereas activation of PKC with phorbol 12-myristate 13-acetate resulted in attenuation of capacitative  $\text{Ca}^{2+}$  entry. Moreover, pretreatment with bisindolylmaleimide prevented the propofol-induced attenuation of capacitative  $\text{Ca}^{2+}$  entry. Taken together, these results suggest that propofol inhibits capacitative  $\text{Ca}^{2+}$  entry *via* a PKC-dependent mechanism. The cellular target for this propofol-induced, PKC-mediated attenuation of capacitative  $\text{Ca}^{2+}$  entry remains to be elucidated. The propofol-induced attenuation of the peak response may either directly or indirectly be caused by PKC-dependent inhibition of  $\text{Ca}^{2+}$  channels that mediate capacitative  $\text{Ca}^{2+}$  entry, whereas attenuation of the sustained response may involve effects on the  $\text{Na}^+$ - $\text{Ca}^{2+}$  exchanger or the sarcolemmal  $\text{Ca}^{2+}$  ATPase. The current results are consistent with previous reports that propofol activates purified brain PKC.<sup>29,30</sup> Moreover, we have preliminary data that suggest that propofol increases myofilament  $\text{Ca}^{2+}$  sensitivity in PSMCs *via* a PKC-dependent mechanism.<sup>31</sup>

In previous studies from our laboratory,<sup>5,11</sup> we demonstrated that  $\alpha$ -adrenoreceptor-mediated  $\text{Ca}^{2+}$  oscillations were not altered by the nonselective, broad-range protein kinase inhibitor staurosporine. In contrast, the  $\text{Ca}^{2+}$  oscillations were abolished by SK&F 96365, an inhibitor of capacitative calcium entry, and were attenuated by tyrosine kinase inhibition with genestein or tyrphostin. In this study, selective inhibition of PKC potentiated capacitative  $\text{Ca}^{2+}$  entry, whereas selective inhibition of tyrosine kinases attenuated capacitative  $\text{Ca}^{2+}$  entry. Because staurosporine effectively blocks both tyrosine kinases and PKC, the lack of effect of staurosporine on the  $\alpha$ -adrenoreceptor-mediated  $\text{Ca}^{2+}$

oscillations is likely a result of offsetting effects on capacitative  $\text{Ca}^{2+}$  entry, resulting in no net effect on the  $\text{Ca}^{2+}$  oscillations. Although propofol (1–10  $\mu\text{M}$ ) attenuated capacitative  $\text{Ca}^{2+}$  entry in this study, we previously reported that the propofol-induced attenuation of  $\alpha$ -adrenoreceptor-mediated  $\text{Ca}^{2+}$  oscillations was apparent only at supraclinical concentrations.<sup>9</sup> It should be noted that capacitative  $\text{Ca}^{2+}$  entry is not the only mechanism regulating  $\alpha$ -adrenoreceptor-mediated  $\text{Ca}^{2+}$  oscillations. Moreover, regulation of capacitative  $\text{Ca}^{2+}$  entry and  $\text{Ca}^{2+}$  oscillations has not been entirely elucidated but appears to involve multiple mechanisms. In the current study, we demonstrated opposing actions of tyrosine kinases and PKC activation on capacitative  $\text{Ca}^{2+}$  entry (CCE). It is possible that propofol alters multiple mechanisms involved in the regulation of the  $\text{Ca}^{2+}$  oscillations, some of which may offset the effects of the other.

Although our results suggest that the effects of propofol on capacitative  $\text{Ca}^{2+}$  entry are primarily mediated *via* activation of PKC, alternative interpretations are possible. Propofol alone and tyrphostin alone inhibited capacitative  $\text{Ca}^{2+}$  entry by approximately 30–35%. In the setting of tyrosine kinase inhibition, propofol further attenuated capacitative  $\text{Ca}^{2+}$  entry by approximately 20%. Therefore, it could be argued that a portion of the inhibitory effect of propofol on capacitative  $\text{Ca}^{2+}$  entry may be mediated *via* inhibition of tyrosine kinases. However, this possibility seems unlikely because if the inhibitory effect of propofol on CCE is mediated by a pathway different from PKC, then propofol should continue to exert an inhibitory effect on CCE in the presence of PKC inhibition. Our results indicate that it did not. Given that PKC activation attenuated CCE and PKC inhibition abolished the propofol-induced attenuation in CCE, it seems reasonable to conclude that the effects of propofol are mediated (at least primarily) through PKC activation. This PKC-mediated attenuation of capacitative  $\text{Ca}^{2+}$  entry induced by propofol does not appear to be a general characteristic of intravenous anesthetics. In preliminary studies,<sup>32</sup> thiopental had no effect on capacitative  $\text{Ca}^{2+}$  entry, whereas ketamine attenuated capacitative  $\text{Ca}^{2+}$  entry *via* a mechanism that did not involve PKC. These results indicate that intravenous anesthetics can have differential effects on capacitative  $\text{Ca}^{2+}$  entry that are mediated by more than one cellular mechanism.

In summary, propofol attenuates capacitative  $\text{Ca}^{2+}$  entry in PSMCs. This effect is not altered by inhibition of tyrosine kinases but is abolished by inhibition of PKC. Capacitative  $\text{Ca}^{2+}$  entry should be considered as a possible cellular target for anesthetic agents that alter vascular smooth muscle tone.

## References

1. Putney JW Jr: A model for receptor-regulated calcium entry. *Cell Calcium* 1986; 7:1–12

2. Berridge MJ: Capacitative calcium entry. *Biochem J* 1995; 312:1-11
3. Penner R, Fasolato C, Hoth M: Calcium influx and its control by calcium release. *Neurobiology* 1993; 3:368-74
4. Fasolato C, Innocenti B, Pozzan T: Receptor-activated  $\text{Ca}^{2+}$  influx: How many mechanisms for how many channels? *Trends Pharmacol Sci* 1994; 15: 77-83
5. Doi S, Damron DS, Horibe M, Murray PA: Capacitative  $\text{Ca}^{2+}$  entry and tyrosine kinase activation in canine pulmonary arterial smooth muscle cells. *Am J Physiol* 2000; 278:L118-30
6. Xuan Y-T, Glass P: Propofol regulation of calcium entry pathways in cultured A10 and rat aortic smooth muscle cells. *Br J Pharmacol* 1996; 117:5-12
7. Chang KSK, Davis RF: Propofol produces endothelium-independent vasodilation and may act as a  $\text{Ca}^{2+}$  channel blocker. *Anesth Analg* 1993; 76:24-32
8. Imura N, Shiraishi Y, Katsuya H, Itoh T: Effect of propofol on norepinephrine-induced increases in  $[\text{Ca}^{2+}]_i$  and force in smooth muscle of the rabbit mesenteric resistance artery. *ANESTHESIOLOGY* 1998; 88:1566-78
9. Hamada H, Damron DS, Murray PA: Intravenous anesthetics attenuate phenylephrine-induced calcium oscillations in individual pulmonary artery smooth muscle cells. *ANESTHESIOLOGY* 1997; 87:900-7
10. Hong SJ, Damron DS, Murray PA: Benzodiazepines differentially inhibit phenylephrine-induced calcium oscillations in pulmonary artery smooth muscle cells. *ANESTHESIOLOGY* 1998; 88:792-9
11. Hamada H, Damron DS, Hong SJ, VanWagoner DR, Murray PA: Phenylephrine-induced  $\text{Ca}^{2+}$  oscillations in canine pulmonary artery smooth muscle cells. *Circ Res* 1997; 81:812-23
12. Campbell JH, Campbell GR: Culture techniques and their applications to studies of vascular smooth muscle. *Clin Sci* 1993; 85:501-13
13. Thastrup O, Cullen PJ, Drbak BK, Hanley MR, Dawson AP: Thapsigargin, a tumor promoter, discharges intracellular  $\text{Ca}^{2+}$  stores by specific inhibition of the endoplasmic reticulum  $\text{Ca}^{2+}$ -ATPase. *Proc Natl Acad Sci U S A* 1990; 87:2466-70
14. Song SK, Choi S-Y, Kim K-T: Opposing effects of protein kinase A and C on capacitative calcium entry into HL-60 promyelocytes. *Biochem Pharmacol* 1998; 56:561-7
15. Montero M, Garcia-Sancho J, Alvarez J: Transient inhibition by chemotactic peptide of a store-operated  $\text{Ca}^{2+}$  entry pathway in human neutrophils. *J Biol Chem* 1993; 268:13055-61
16. Peterson CC, Berridge MJ: The regulation of capacitative calcium entry by calcium and protein kinase C in *Xenopus* oocytes. *J Biol Chem* 1994; 269: 32246-53
17. Somlyo AP, Somlyo AV: Signal transduction and regulation in smooth muscle. *Nature* 1994; 372:231-6
18. van Breemen C, Saida K: Cellular mechanisms regulating  $[\text{Ca}^{2+}]_i$  smooth muscle. *Annu Rev Physiol* 1989; 51:315-29
19. O'Donnell ME, Owen NE: Regulation of ion pumps and carriers in vascular smooth muscle. *Physiol Rev* 1994; 74:683-721
20. Alvarez J, Montero M, Garcia-Sancho J: Cytochrome P-450 may link intracellular  $\text{Ca}^{2+}$  stores with plasma membrane  $\text{Ca}^{2+}$  influx. *Biochem J* 1991; 274:193-7
21. Peterson CC, Berridge MJ: G-protein regulation of capacitative calcium entry may be mediated by protein kinases A and C in *Xenopus* oocytes. *Biochem J* 1995; 307:663-8
22. Randiamampita C, Tsien RY: Emptying of intracellular  $\text{Ca}^{2+}$  stores releases a novel small messenger that stimulates  $\text{Ca}^{2+}$  influx. *Nature* 1993; 364:809-14
23. Mene P, Pugliese F, Cinotti G: Regulation of capacitative calcium influx in cultured human mesangial cells: Roles of protein kinase C and calmodulin. *J Am Soc Nephrol* 1996; 7:983-90
24. Bode HP, Göke B: Protein kinase C activates capacitative calcium entry in the insulin secreting cell line RINm5F. *FEBS Lett* 1994; 339:307-11
25. Takenaka H, Imoto K, Sakano S, Kaneko M, Ohshika H: Involvement of tyrosine kinase in capacitative  $\text{Ca}^{2+}$  entry pathway in rat glioma C6 cells. *Mol Pathway Pharm* 1997; 98:127-40
26. Yule DI, Kim ET, Williams JA: Tyrosine kinase inhibitors attenuate "capacitative"  $\text{Ca}^{2+}$  influx in rat pancreatic acinar cells. *Biochem Biophys Res Commun* 1994; 202:1697-704
27. Sargeant P, Farndale RW, Sage SO: ADP- and thapsigargin-evoked  $\text{Ca}^{2+}$  entry and protein-tyrosine phosphorylation are inhibited by the tyrosine kinase inhibitors genistein and methyl-2,5-dihydroxycinnamate in fura-2-loaded human platelets. *J Biol Chem* 1993; 268:18151-6
28. Samain E, Bouillier H, Marty J, Safar M, Dagher G: The effect of propofol on angiotensin II-induced  $\text{Ca}^{2+}$  mobilization in aortic smooth muscle cells from normotensive and hypertensive rats. *Anesth Analg* 2000; 90:546-52
29. Hemmings HC Jr, Adamo AI: Effects of halothane and propofol on purified brain protein kinase C activation. *ANESTHESIOLOGY* 1994; 81:147-55
30. Hemmings HC Jr, Adamo AI, Hoffman MM: Biochemical characterization of the stimulatory effects of halothane and propofol on purified brain protein kinase C. *Anesth Analg* 1995; 81:1216-22
31. Tanaka S, Kondo I, Damron DS, Murray PA: Propofol increases myofilament calcium sensitivity via protein kinase C activation (abstract). *ANESTHESIOLOGY* 2000; 92:A1347
32. Kondo I, Tanaka S, Damron D, Murray PA: Intravenous anesthetics inhibit capacitative calcium entry in pulmonary artery smooth muscle cells (abstract). *ANESTHESIOLOGY* 2000; 92:A1327
